# Supplementary material
Source: PubMed Central journal article supplement (PMC9997118)
Supplement: NIHMS1868306-supplement-Supplemental_Information.pdf [file NIHMS1868306-supplement-Supplemental_Information.pdf]

# Supporting Information

## Freestanding hydrogel lumens for modeling blood vessels and vasodilation

Ashley M. Dostie,<sup>\*,1</sup> Hannah G. Lea,<sup>\*,1</sup> Ulri N. Lee,<sup>\*,1</sup> Tammi L. van Neel,<sup>1</sup> Erwin Berthier,<sup>1</sup> Ashleigh B. Theberge<sup>1,2</sup>

<sup>1</sup>Department of Chemistry, University of Washington, Seattle, WA, USA

<sup>2</sup>Department of Urology, University of Washington School of Medicine, Seattle, WA, USA

\*Denotes co-first author

Contents:

Table S1: Full set of data for Figure 2Bi and 2Bii

Table S1. Full set of data for Figure 2Bi and 2Bii. Each ring was measured four times for outer diameter (OD) and inner diameter (ID).

|                         | Length (mm) | Average (mm) | SD (mm)    |
|-------------------------|-------------|--------------|------------|
| Expt 1-rack 1_ring 1-OD | 2.568       | 2.5905       | 0.07421366 |
|                         | 2.558       |              |            |
|                         | 2.7         |              |            |
|                         | 2.536       |              |            |
| Expt 1-rack 1_ring 1-ID | 0.854       | 0.8275       | 0.01887679 |
|                         | 0.815       |              |            |
|                         | 0.828       |              |            |
|                         | 0.813       |              |            |
| Expt 1-rack 1_ring 2-OD | 2.508       | 2.59025      | 0.06186208 |
|                         | 2.654       |              |            |
|                         | 2.615       |              |            |
|                         | 2.584       |              |            |
| Expt 1-rack 1_ring 2-ID | 0.807       | 0.7895       | 0.02703701 |
|                         | 0.807       |              |            |
|                         | 0.794       |              |            |
|                         | 0.75        |              |            |
| Expt 1-rack 1_ring 3-OD | 2.28        | 2.452        | 0.14038993 |
|                         | 2.502       |              |            |
|                         | 2.612       |              |            |
|                         | 2.414       |              |            |
| Expt 1-rack 1_ring 3-ID | 0.835       | 0.82275      | 0.0160494  |
|                         | 0.823       |              |            |
|                         | 0.833       |              |            |
|                         | 0.8         |              |            |
| Expt 1-rack 1_ring 4-OD | 2.368       | 2.44475      | 0.06774154 |
|                         | 2.463       |              |            |
|                         | 2.42        |              |            |
|                         | 2.528       |              |            |
| Expt 1-rack 1_ring 4-ID | 0.749       | 0.76475      | 0.02142234 |
|                         | 0.796       |              |            |
|                         | 0.753       |              |            |
|                         | 0.761       |              |            |

|                         |       |         |            |
|-------------------------|-------|---------|------------|
| Expt 1-rack 1_ring 5-OD | 2.621 | 2.6095  | 0.08943713 |
|                         | 2.642 |         |            |
|                         | 2.692 |         |            |
|                         | 2.483 |         |            |
| Expt 1-rack 1_ring 5-ID | 0.733 | 0.72775 | 0.06168401 |
|                         | 0.686 |         |            |
|                         | 0.813 |         |            |
|                         | 0.679 |         |            |
| Expt 1-rack 1_ring 6-OD | 2.258 | 2.1635  | 0.1523275  |
|                         | 1.938 |         |            |
|                         | 2.204 |         |            |
|                         | 2.254 |         |            |
| Expt 1-rack 1_ring 6-ID | 0.807 | 0.80975 | 0.02862837 |
|                         | 0.799 |         |            |
|                         | 0.783 |         |            |
|                         | 0.85  |         |            |
| Expt 1-rack 2_ring 1-OD | 2.725 | 2.71275 | 0.03255124 |
|                         | 2.678 |         |            |
|                         | 2.696 |         |            |
|                         | 2.752 |         |            |
| Expt 1-rack 2_ring 1-ID | 0.771 | 0.7625  | 0.03256276 |
|                         | 0.736 |         |            |
|                         | 0.738 |         |            |
|                         | 0.805 |         |            |
| Expt 1-rack 2_ring 2-OD | 2.674 | 2.6585  | 0.06851521 |
|                         | 2.674 |         |            |
|                         | 2.724 |         |            |
|                         | 2.562 |         |            |
| Expt 1-rack 2_ring 2-ID | 0.874 | 0.76075 | 0.0958797  |
|                         | 0.668 |         |            |
|                         | 0.696 |         |            |
|                         | 0.805 |         |            |
| Expt 1-rack 2_ring 3-OD | 2.456 | 2.42875 | 0.06909595 |
|                         | 2.504 |         |            |
|                         | 2.414 |         |            |
|                         | 2.341 |         |            |

|                         |       |         |            |
|-------------------------|-------|---------|------------|
| Expt 1-rack 2_ring 3-ID | 0.846 | 0.80975 | 0.04262531 |
|                         | 0.787 |         |            |
|                         | 0.845 |         |            |
|                         | 0.761 |         |            |
| Expt 1-rack 2_ring 4-OD | 2.589 | 2.554   | 0.06827884 |
|                         | 2.452 |         |            |
|                         | 2.58  |         |            |
|                         | 2.595 |         |            |
| Expt 1-rack 2_ring 4-ID | 0.87  | 0.83975 | 0.02030394 |
|                         | 0.833 |         |            |
|                         | 0.828 |         |            |
|                         | 0.828 |         |            |
| Expt 1-rack 2_ring 5-OD | 2.684 | 2.6905  | 0.0230579  |
|                         | 2.716 |         |            |
|                         | 2.662 |         |            |
|                         | 2.7   |         |            |
| Expt 1-rack 2_ring 5-ID | 0.897 | 0.888   | 0.02843707 |
|                         | 0.918 |         |            |
|                         | 0.887 |         |            |
|                         | 0.85  |         |            |
| Expt 1-rack 2_ring 6-OD | 2.684 | 2.72625 | 0.03584573 |
|                         | 2.769 |         |            |
|                         | 2.715 |         |            |
|                         | 2.737 |         |            |
| Expt 1-rack 2_ring 6-ID | 0.807 | 0.78275 | 0.02315707 |
|                         | 0.765 |         |            |
|                         | 0.798 |         |            |
|                         | 0.761 |         |            |
| Expt 2-rack 1_ring 1-OD | 2.753 | 2.73275 | 0.0306635  |
|                         | 2.697 |         |            |
|                         | 2.718 |         |            |
|                         | 2.763 |         |            |
| Expt 2-rack 1_ring 1-ID | 0.785 | 0.78575 | 0.02099802 |
|                         | 0.815 |         |            |
|                         | 0.777 |         |            |
|                         | 0.766 |         |            |

|                         |       |         |            |
|-------------------------|-------|---------|------------|
| Expt 2-rack 1_ring 2-OD | 2.742 | 2.7005  | 0.03435598 |
|                         | 2.668 |         |            |
|                         | 2.677 |         |            |
|                         | 2.715 |         |            |
| Expt 2-rack 1_ring 2-ID | 0.759 | 0.724   | 0.04291076 |
|                         | 0.675 |         |            |
|                         | 0.701 |         |            |
|                         | 0.761 |         |            |
| Expt 2-rack 1_ring 3-OD | 2.457 | 2.402   | 0.06291264 |
|                         | 2.363 |         |            |
|                         | 2.334 |         |            |
|                         | 2.454 |         |            |
| Expt 2-rack 1_ring 3-ID | 0.812 | 0.72025 | 0.06551527 |
|                         | 0.659 |         |            |
|                         | 0.716 |         |            |
|                         | 0.694 |         |            |
| Expt 2-rack 1_ring 4-OD | 2.758 | 2.72025 | 0.03666402 |
|                         | 2.742 |         |            |
|                         | 2.677 |         |            |
|                         | 2.704 |         |            |
| Expt 2-rack 1_ring 4-ID | 0.828 | 0.806   | 0.03293428 |
|                         | 0.833 |         |            |
|                         | 0.761 |         |            |
|                         | 0.802 |         |            |
| Expt 2-rack 1_ring 5-OD | 2.773 | 2.8295  | 0.06239925 |
|                         | 2.868 |         |            |
|                         | 2.897 |         |            |
|                         | 2.78  |         |            |
| Expt 2-rack 1_ring 5-ID | 0.692 | 0.71925 | 0.05586517 |
|                         | 0.759 |         |            |
|                         | 0.772 |         |            |
|                         | 0.654 |         |            |
| Expt 2-rack 1_ring 6-OD | 2.63  | 2.578   | 0.07538789 |
|                         | 2.466 |         |            |
|                         | 2.607 |         |            |
|                         | 2.609 |         |            |

|                         |       |         |            |
|-------------------------|-------|---------|------------|
| Expt 2-rack 1_ring 6-ID | 0.775 | 0.82225 | 0.04050823 |
|                         | 0.842 |         |            |
|                         | 0.805 |         |            |
|                         | 0.867 |         |            |
| Expt 2-rack 2_ring 1-OD | 2.758 | 2.71875 | 0.06869922 |
|                         | 2.621 |         |            |
|                         | 2.722 |         |            |
|                         | 2.774 |         |            |
| Expt 2-rack 2_ring 1-ID | 0.823 | 0.84325 | 0.01822773 |
|                         | 0.865 |         |            |
|                         | 0.835 |         |            |
|                         | 0.85  |         |            |
| Expt 2-rack 2_ring 2-OD | 2.732 | 2.7545  | 0.01567376 |
|                         | 2.763 |         |            |
|                         | 2.767 |         |            |
|                         | 2.756 |         |            |
| Expt 2-rack 2_ring 2-ID | 0.825 | 0.82425 | 0.00788987 |
|                         | 0.817 |         |            |
|                         | 0.82  |         |            |
|                         | 0.835 |         |            |
| Expt 2-rack 2_ring 3-OD | 2.774 | 2.825   | 0.08807951 |
|                         | 2.951 |         |            |
|                         | 2.756 |         |            |
|                         | 2.819 |         |            |
| Expt 2-rack 2_ring 3-ID | 0.754 | 0.75425 | 0.0425     |
|                         | 0.701 |         |            |
|                         | 0.805 |         |            |
|                         | 0.757 |         |            |
| Expt 2-rack 2_ring 4-OD | 2.761 | 2.75775 | 0.0025     |
|                         | 2.757 |         |            |
|                         | 2.755 |         |            |
|                         | 2.758 |         |            |
| Expt 2-rack 2_ring 4-ID | 0.787 | 0.76875 | 0.02224672 |
|                         | 0.767 |         |            |
|                         | 0.738 |         |            |
|                         | 0.783 |         |            |

|                         |       |         |            |
|-------------------------|-------|---------|------------|
| Expt 2-rack 2_ring 5-OD | 2.725 | 2.726   | 0.02496664 |
|                         | 2.697 |         |            |
|                         | 2.724 |         |            |
|                         | 2.758 |         |            |
| Expt 2-rack 2_ring 5-ID | 0.831 | 0.803   | 0.03836665 |
|                         | 0.759 |         |            |
|                         | 0.783 |         |            |
|                         | 0.839 |         |            |
| Expt 2-rack 2_ring 6-OD | 2.457 | 2.58375 | 0.09788216 |
|                         | 2.687 |         |            |
|                         | 2.566 |         |            |
|                         | 2.625 |         |            |
| Expt 2-rack 2_ring 6-ID | 0.664 | 0.71975 | 0.04428977 |
|                         | 0.738 |         |            |
|                         | 0.768 |         |            |
|                         | 0.709 |         |            |
